# Supplementary material for: Biaxially oriented films of grafted-polypropylene with giant energy density and high efficiency at 125 °C
Source: Royal Society of Chemistry journal article supplement (doi:10.1039/d3ta00437f), 2023-01-01
Supplement: d3ta00437f1.pdf [file d3ta00437f1.pdf]

## Supporting Information

for

### Biaxially Oriented Films of Grafted-Polypropylene with Giant Energy Density and High Efficiency at 125 °C

Junluo Li<sup>1</sup>, Shaojie Wang<sup>1</sup>, Yujie Zhu<sup>1</sup>, Zhen Luo<sup>1</sup>, Ya-Ru Zhang<sup>2</sup>, Qing Shao<sup>2</sup>, Hui Quan<sup>2</sup>, Mingti Wang<sup>2</sup>, Shixun Hu<sup>1</sup>, Mingcong Yang<sup>1</sup>, Jing Fu<sup>1</sup>, Rui Wang<sup>1</sup>, Jun Hu<sup>1</sup>, Hao Yuan<sup>2,\*</sup>, Jinliang He<sup>1,\*</sup>, Qi Li<sup>1,\*</sup>

<sup>1</sup> State Key Laboratory of Power Systems, Department of Electrical Engineering, Tsinghua University, Beijing 100084, China.

E-mail: qili1020@tsinghua.edu.cn

E-mail: hejl@tsinghua.edu.cn

<sup>2</sup> SINOPEC Beijing Research Institute of Chemical Industry, Beijing 100013, People's Republic of China, Beijing 100013, China

E-mail: yuanhao.bjhy@sinopec.com

Table S1 Thermal Properties for BO-(PP-g-MMA) and BOPP.

| Sample             | Melting temperature (°C) |           | Melting enthalpy (J/g) |           | Crystallinity (%) |           |
|--------------------|--------------------------|-----------|------------------------|-----------|-------------------|-----------|
|                    | Heating 1                | Heating 2 | Heating 1              | Heating 2 | Heating 1         | Heating 2 |
| BOPP               | 168.99                   | 163.84    | 104.2                  | 91.47     | 49.86%            | 43.77%    |
| BO-(PP-g-MMA)-2.5% | 169.94                   | 163.1     | 100.5                  | 88.01     | 48.09%            | 42.11%    |
| BO-(PP-g-MMA)-5%   | 169.74                   | 164.06    | 102.8                  | 90.29     | 49.19%            | 43.20%    |
| BO-(PP-g-MMA)-7.5% | 170.27                   | 163.5     | 98.22                  | 84.28     | 47.00%            | 40.33%    |
| BO-(PP-g-MMA)-10%  | 169.07                   | 164.3     | 96.52                  | 84.28     | 46.18%            | 40.33%    |

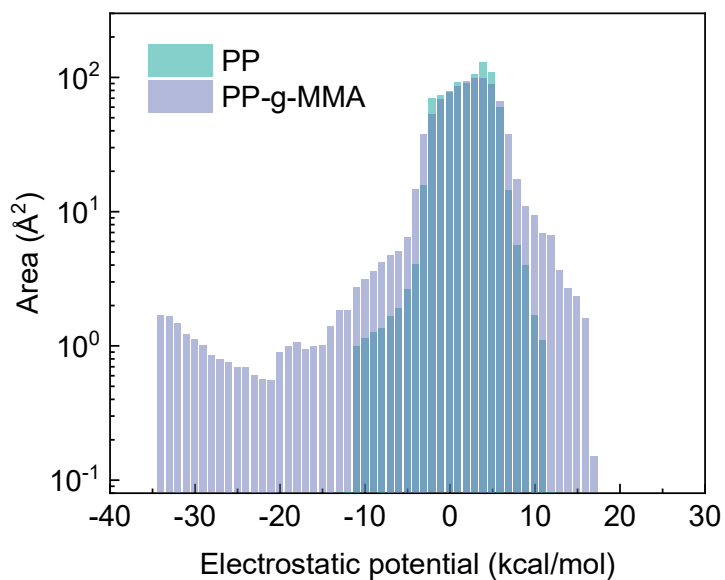

Figure S1 Area percentage of Electrostatic potential of PP and PP-g-MMA

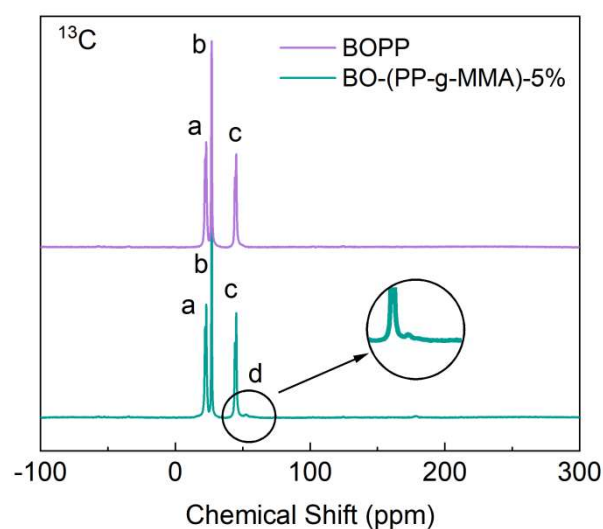

Figure S2 SSNMR spectra of BO-(PP-g-MMA)-5% and BOPP

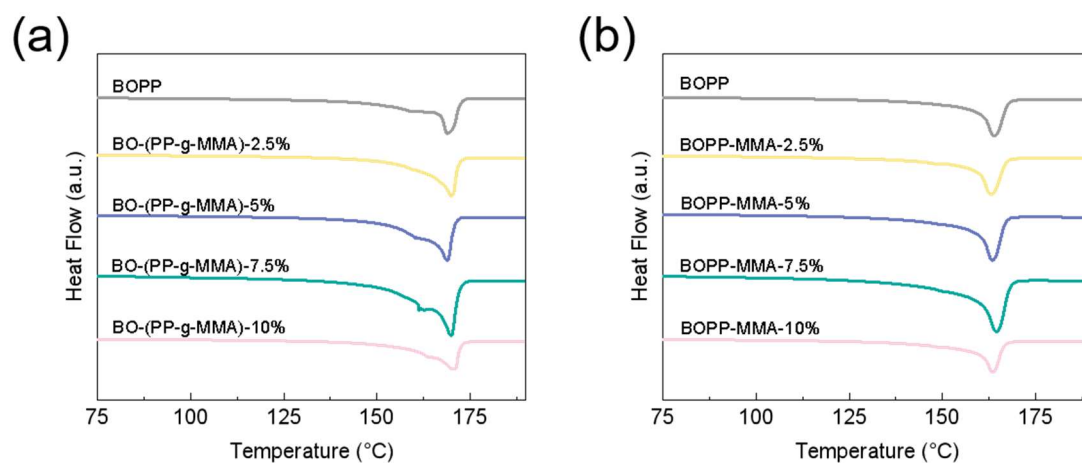

Figure S3 DSC thermograms for BO-(PP-g-MMA) and BOPP. (a) Heating 1 and (b) Heating 2.

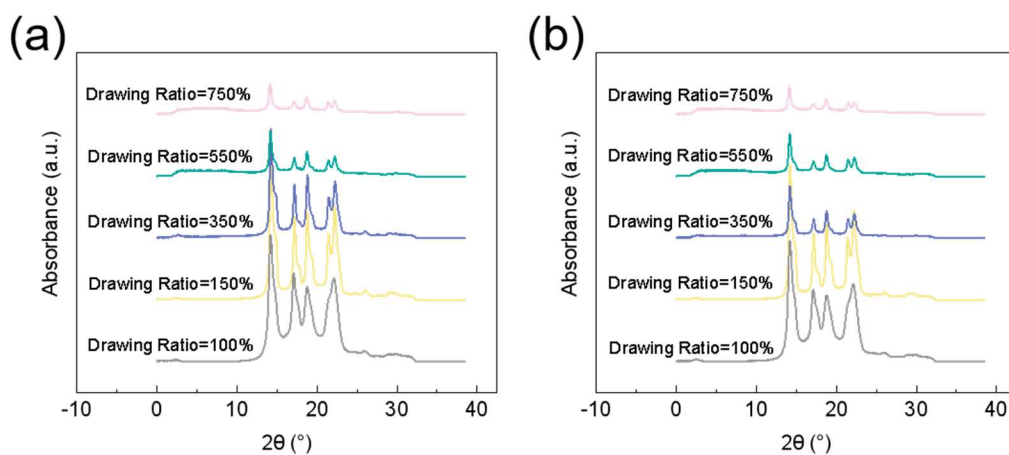

Figure S4 1D integrated WAXD curves of (a) PP-g-MMA-5% and (b) PP.

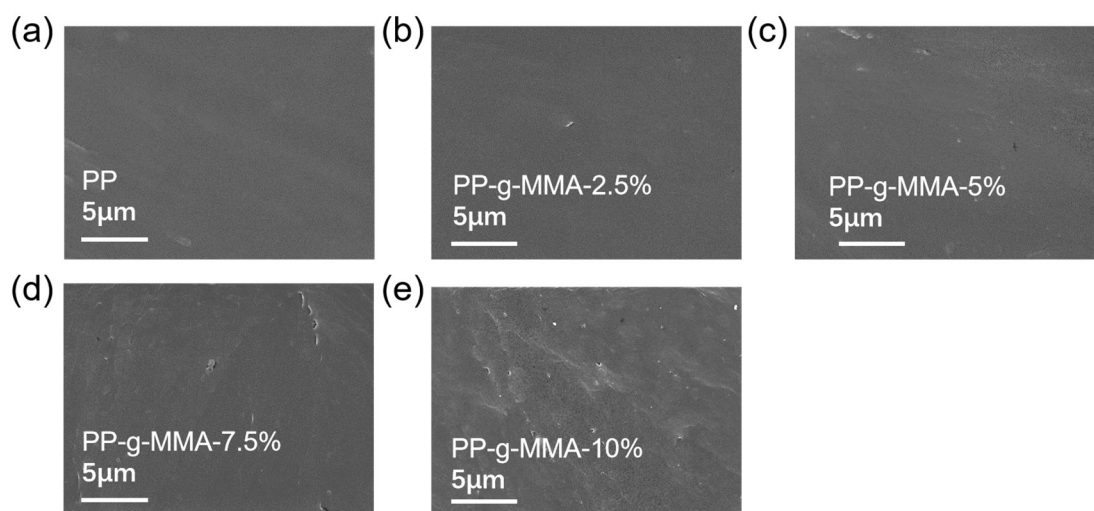

Figure S5 Cross-sectional SEM images of PP and PP-g-MMA. (a) PP, (b) PP-g-MMA-2.5%, (c) PP-g-MMA-5%, (d) PP-g-MMA-7.5% and (e) PP-g-MMA-10%.

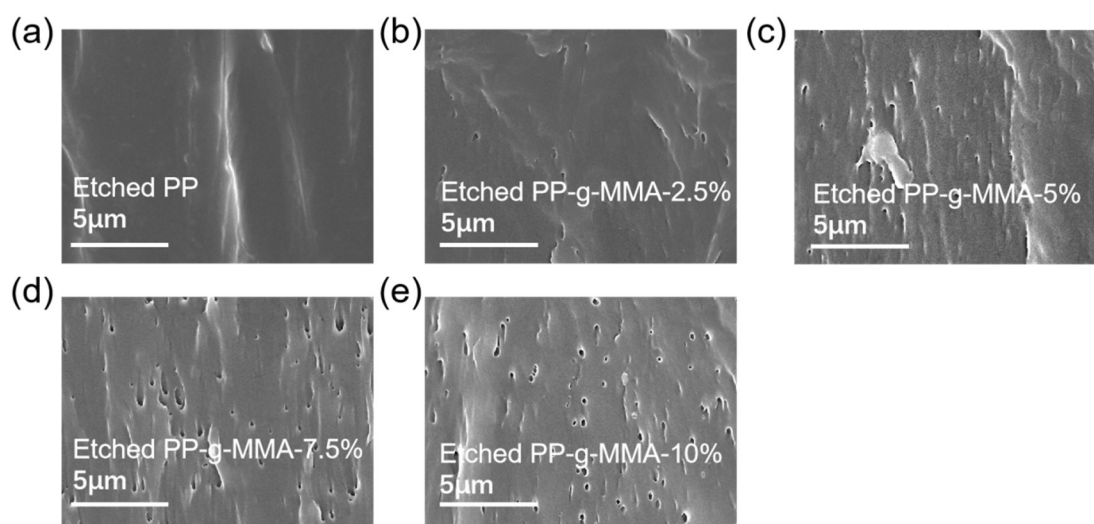

Figure S6 Cross-sectional SEM images of PP and PP-g-MMA after etched by xylene. (a) PP, (b) PP-g-MMA-2.5%, (c) PP-g-MMA-5%, (d) PP-g-MMA-7.5% and (e) PP-g-MMA-10%.

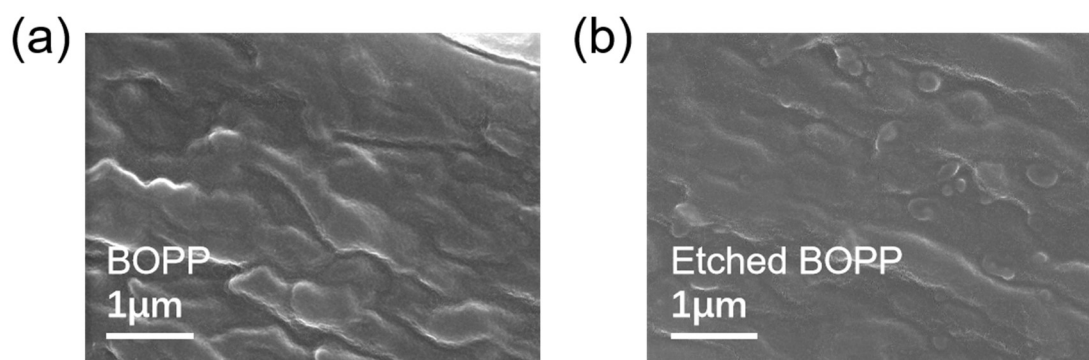

Figure S7 Cross-sectional SEM images of (a) BOPP and (b) Etched BOPP by xylene.

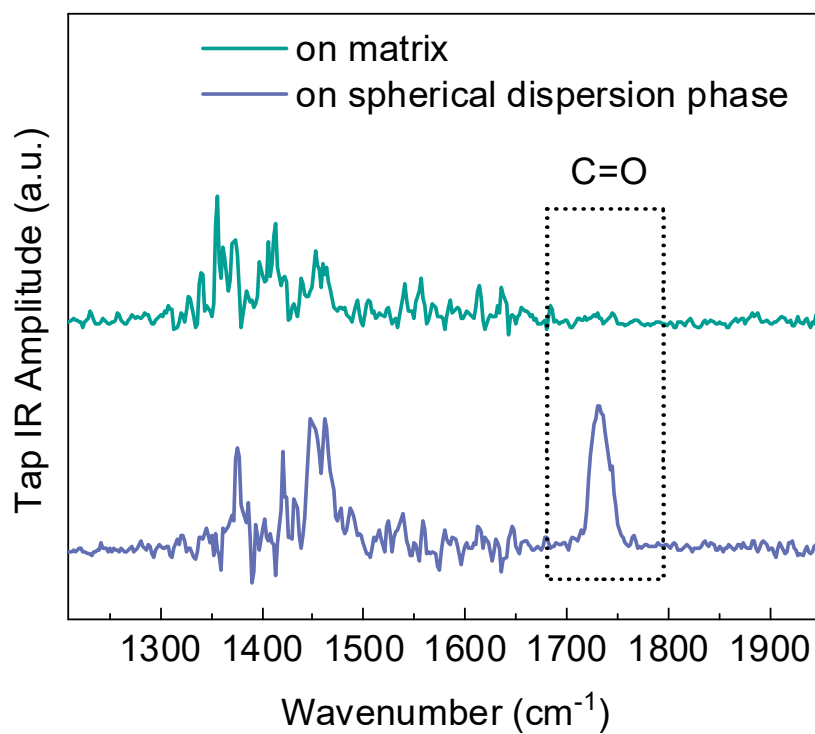

Figure S8 NanoIR spectroscopy spectrum on matrix and spherical dispersion phase for BO-(PP-g-MMA)-5%.

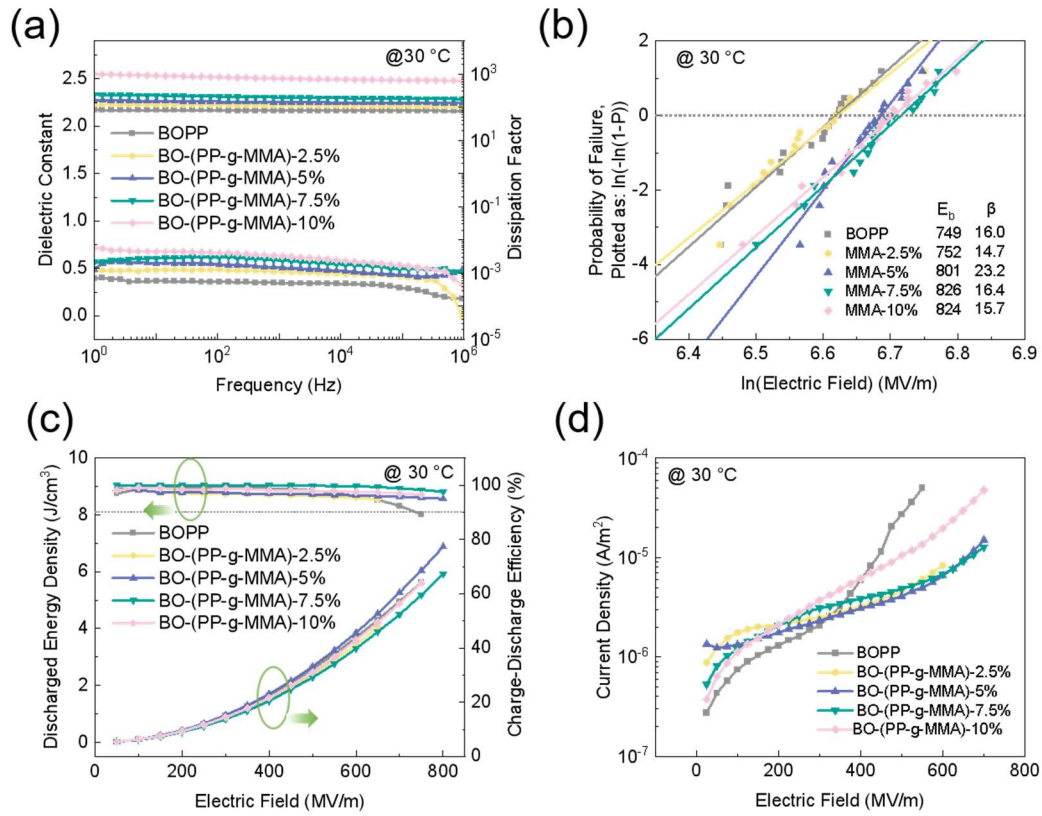

Figure S9 Room-temperature energy storage performance of BO-(PP-g-MMA) and BOPP. (a) Frequency dependent dielectric constant and dissipation factor at 30 °C. (b) Weibull distribution of the breakdown strength at 30 °C. (c) Charge-discharge efficiency and discharged energy density at 30 °C. (d) Leakage current density at 30 °C.

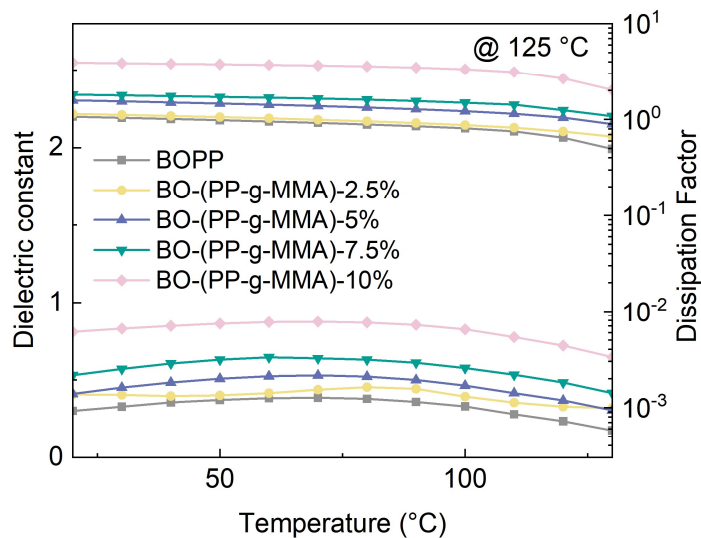

Figure S10 Temperature dependence of the dielectric constant and dissipation factor

of BOPP and grafted BOPP

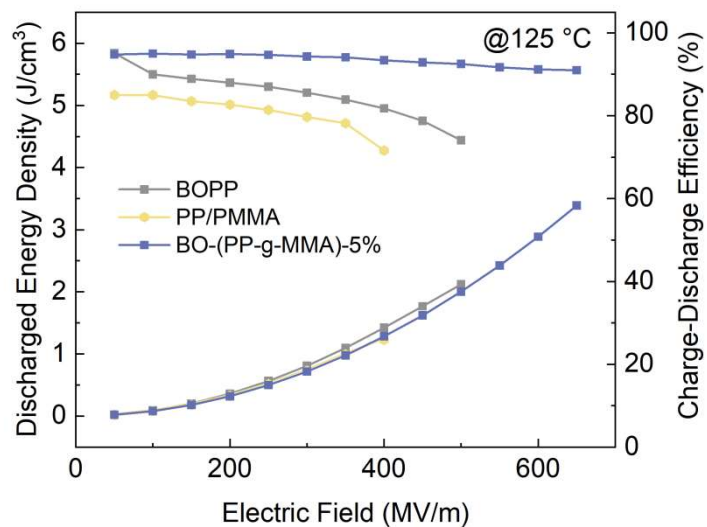

Figure S11 Field-dependent energy density and discharge efficiency of BOPP, PP/PMMA and BO-(PP-g-MMA)-5% at 125 °C.

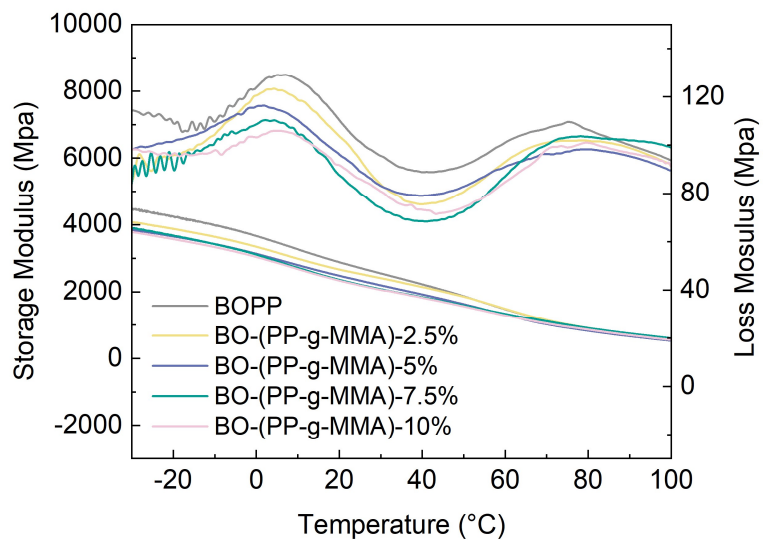

Figure S12 Storage modulus and loss modulus of BOPP and grafted BOPP

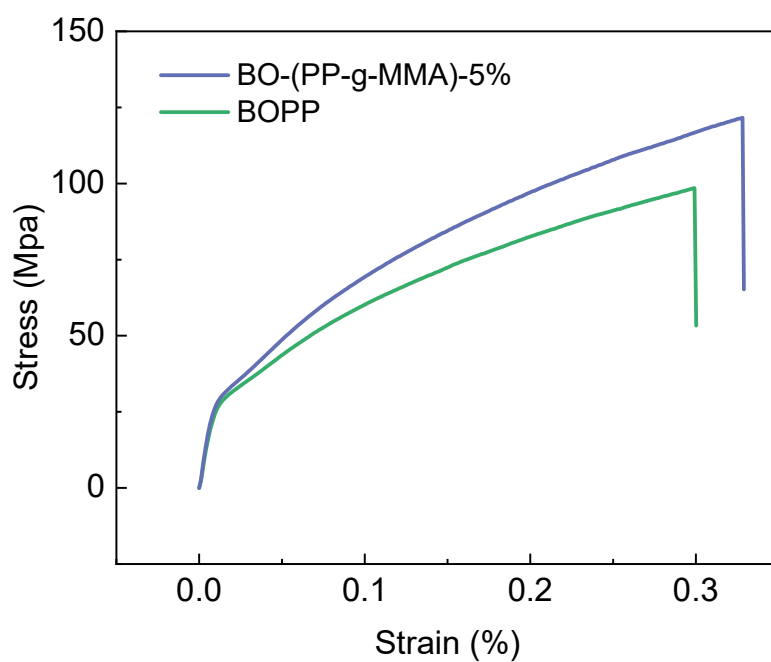

Figure S13 Strain-stress curve of BOPP and BO-(PP-g-MMA)-5%

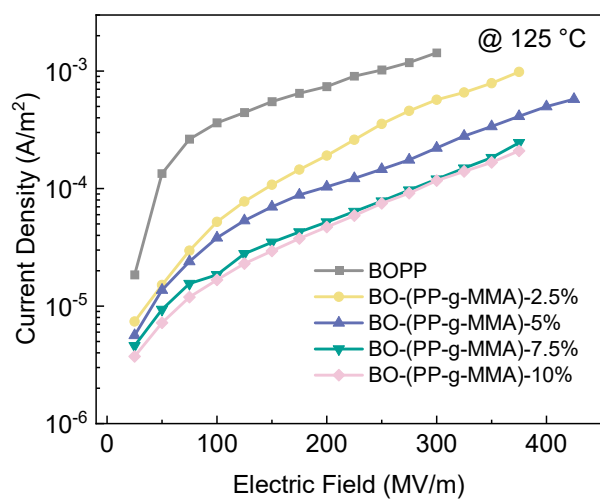

Figure S14 High-temperature leakage current density of BO-(PP-g-MMA) and BOPP.



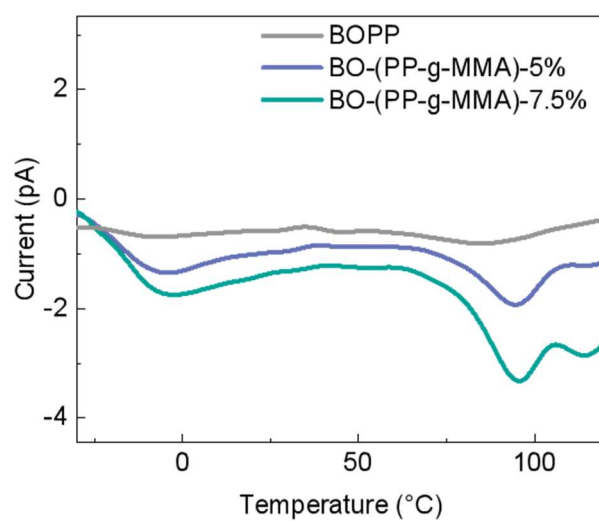

Figure S15 Thermally stimulated current spectra of BO-(PP-g-MMA)-5% , BO-(PP-g-MMA)-7.5% and BOPP under the polarization electric field of 50MV/m.
